# Supplementary material for: Host succinate inhibits influenza virus infection through succinylation and nuclear retention of the viral nucleoprotein
Source: PubMed Central journal article supplement — EMBO J. 2022 May 4;41(12):e108306. doi: 10.15252/embj.2021108306 (PMC9194747; doi:10.15252/embj.2021108306), 2022-05-04
Supplement: EMBJ-41-e108306-s002.pdf [file EMBJ-41-e108306-s002.pdf]

## **APPENDIX Table of Content**

**Appendix Figure S1. Effect of succinate on gene expression in influenza virus-infected human bronchial epithelial cells.**

**Appendix Figure S2. Succinate is not cytotoxic.**

**Appendix Figure S3. Scanning and transmission electron microscopy of influenza virus-infected lung epithelial cells, treated or not by succinate.**

**Appendix Figure S4. Antiviral effect of succinate in distinct airway epithelial cell lines.**

**Appendix Figure S5. Datasheet of mouse XL cytokine array kit.**

**Appendix Figure S6. Flow cytometry gating strategy.**

**Appendix Figure S7. Mass spectrometry methodology and profiles.**

**Appendix Figure S8. Similar growth of wild-type K87 and mutant K87R IAV strains.**

**Appendix Figure S9. Impact of the NP structure on its interaction capacity with viral RNA.**

**Appendix Table S1. List of all reagents and resources used**

# Guillon *et al.* Appendix Figure S1

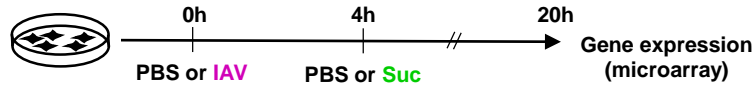

## Canonical pathways

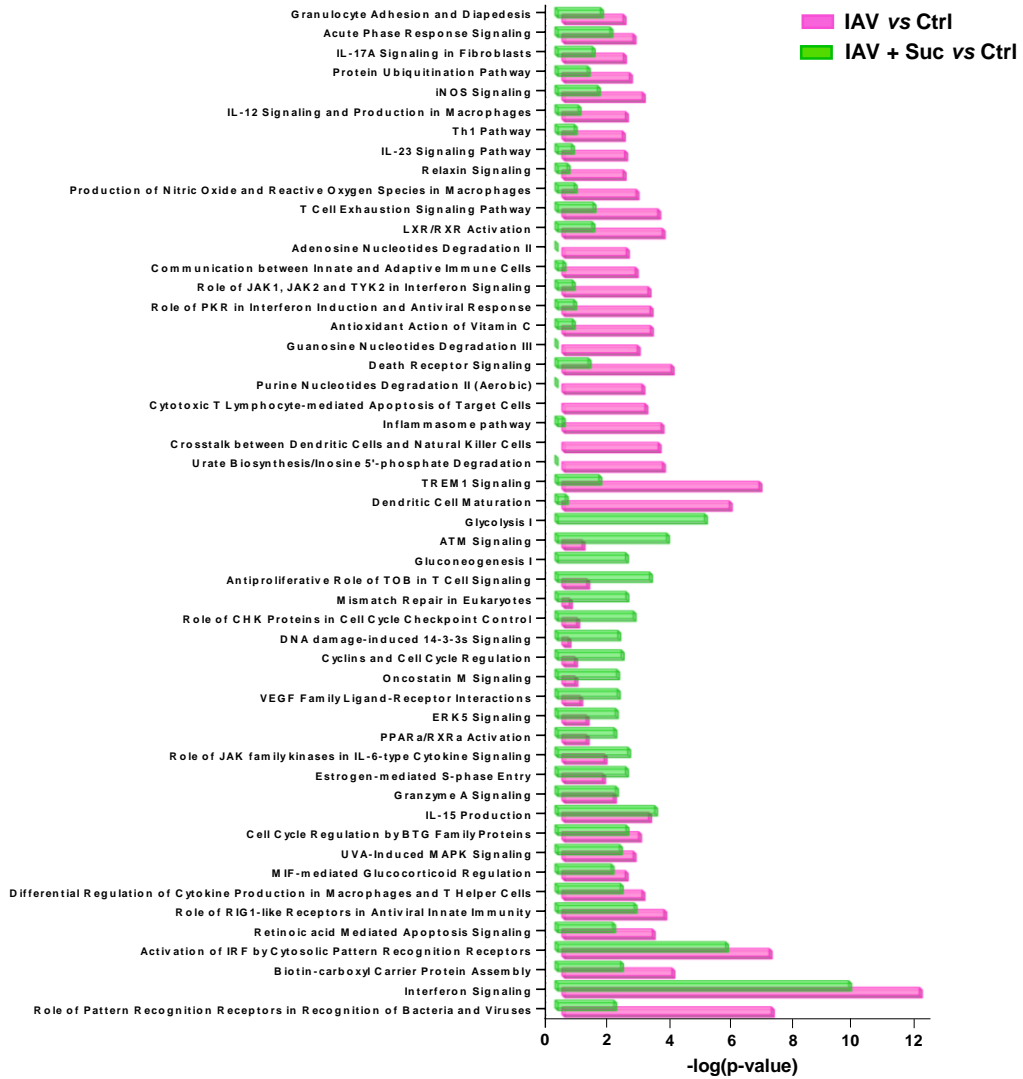

**Appendix Figure S1. Effect of succinate on gene expression in influenza virus-infected human bronchial epithelial cells.**

Human bronchial epithelial BEAS-2B cells (4 replicates *per* condition) were infected or not (“Ctrl”) with the A/Scotland/20/74 (H3N2) virus (IAV) at MOI=1 and were treated or not with succinate (4mg/mL). After 24 h of infection, cells were lysed and total RNA was purified and processed to hybridize pangenomic microarrays. Differentially expressed genes (p-value  $\geq 2$ ) between two conditions (“IAV-infected cells” *vs.* “control cells” and “IAV-infected cells treated with succinate” *vs.* “control cells”) were then selected to perform a gene ontology analysis. Significantly enriched pathways were identified using Ingenuity Pathway Analysis (IPA) and are represented as a bar plot representing the right-tailed Fisher’s exact test that was used to calculate a p-value (probability that each canonical pathway assigned to that data set is due to chance alone).

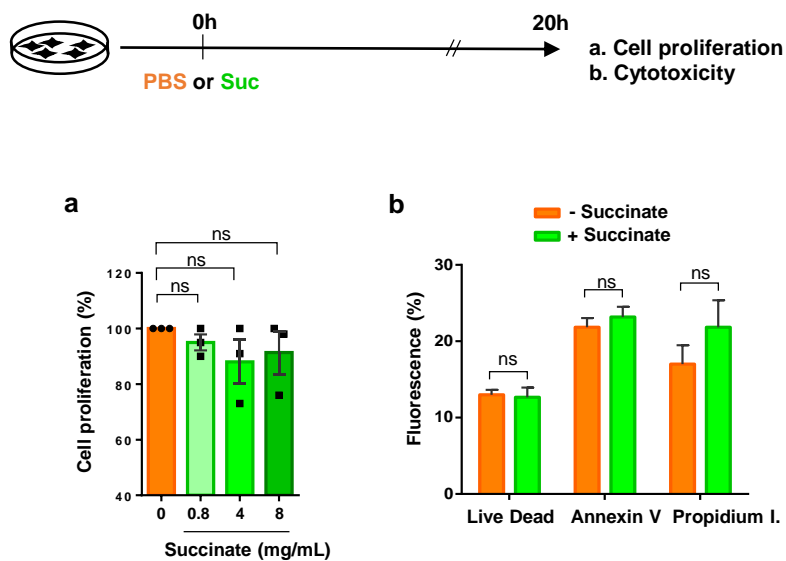

**Appendix Figure S2. Succinate is not cytotoxic.**

Human bronchial epithelial BEAS-2B cells were treated or not with increasing doses (**a**) or 4 mg/mL (**b**) of succinate for 24 h. Cell proliferation and cytotoxicity were further assessed by an MTS test (**a**) and by flow cytometry using a Live/Dead staining/Annexin V/Propidium Iodide co-staining (**b**), respectively. Data are represented as the mean  $\pm$ SEM. Statistical analysis was performed using the Kruskal-Wallis test (**a**,  $n=3$ ) and the multiple t-test (**b**,  $n=6$ ).

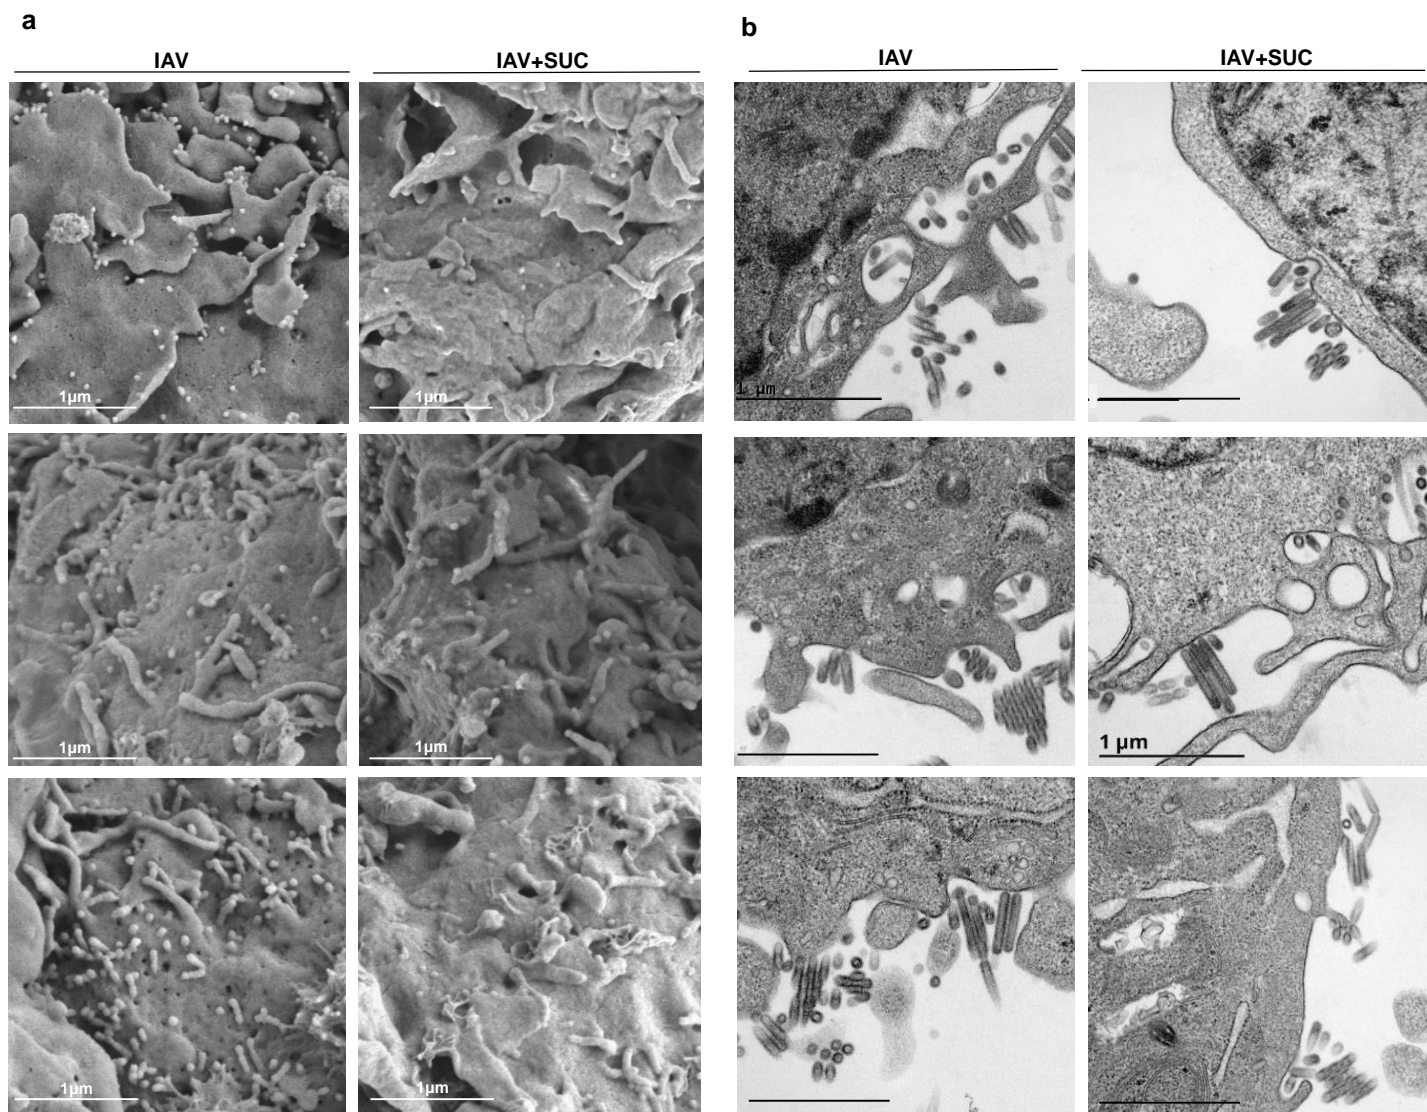

**Appendix Figure S3. Scanning and transmission electron microscopy of IAV-infected lung epithelial cells, treated or not by succinate.**

Bronchial epithelial (BEAS-2B) cells were infected with influenza A/Scotland/20/74 (H3N2) virus (IAV) at MOI=5 for 4 h and treated or not with succinate (Suc) for 20 h. Scanning (a) and transmission (b) electron microscopy were used to assess the production of physical viral particles in the supernatants of IAV-infected cells, treated or not with succinate. Scale bar: 1 μM.

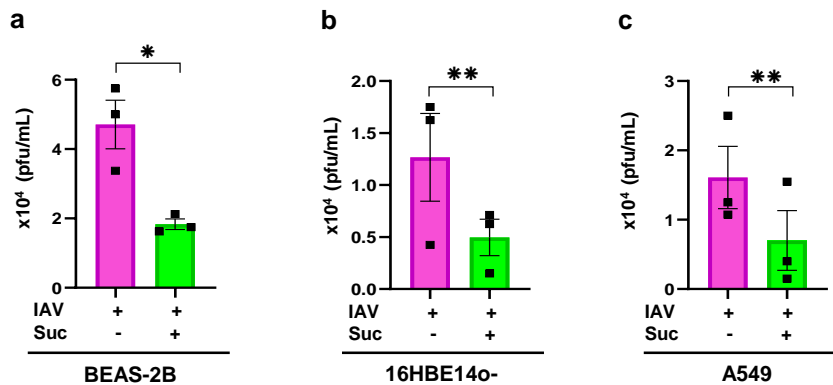

**Appendix Figure S4. Antiviral effect of succinate in distinct airway epithelial cell lines.**

Human lung epithelial (a) BEAS-2B, (b) 16HBE14o- or (c) A549 cells were infected with influenza A/Scotland/20/74 (H3N2) virus (IAV) at MOI=1 for 4h and treated or not with succinate (Suc) for 20h. Plaque-Forming Units assay determined the production of infectious viral particles in cell supernatants. Data are represented as the mean  $\pm$  SEM of 3 independent experiments. Statistical analysis was performed using paired t-test.

# Guillon *et al.* Appendix Figure S5

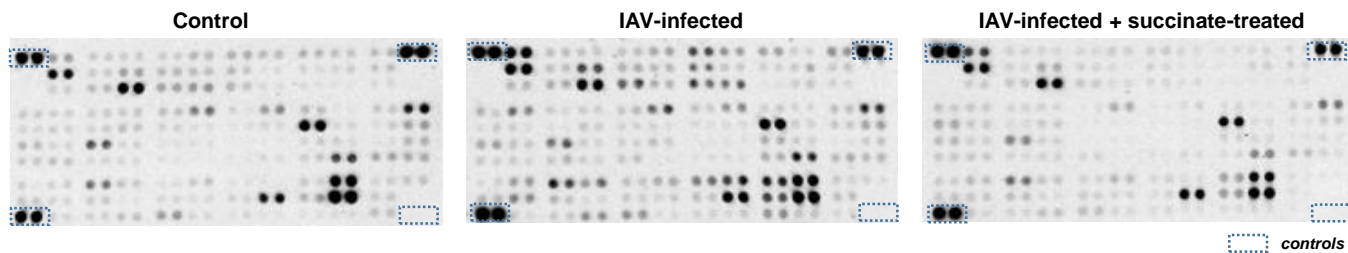

Protein-array coordinates

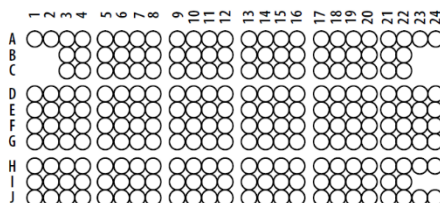

| Coordinate | Analyte/Control                      | Entrez Gene ID | Alternate Nomenclature                               | Coordinate | Analyte/Control                 | Entrez Gene ID | Alternate Nomenclature                     |
|------------|--------------------------------------|----------------|------------------------------------------------------|------------|---------------------------------|----------------|--------------------------------------------|
| A1, A2     | Reference Spots                      | N/A            |                                                      | F1, F2     | IGFBP-3                         | 16009          |                                            |
| A3, A4     | Adiponectin/Acrp30                   | 11450          | AdipoQ                                               | F3, F4     | IGFBP-5                         | 16011          |                                            |
| A5, A6     | Amphiregulin                         | 11839          | AR, SDGF                                             | F5, F6     | IGFBP-6                         | 16012          |                                            |
| A7, A8     | Angiotensin-1                        | 11600          | Ang-1, Angpt1                                        | F7, F8     | IL-1 $\alpha$ /IL-1F1           | 16175          |                                            |
| A9, A10    | Angiotensin-2                        | 11601          | Ang-2, Angpt2                                        | F9, F10    | IL-1 $\beta$ /IL-1F2            | 16176          |                                            |
| A11, A12   | Angiotensin-like 3                   | 30924          | ANGPT-L3                                             | F11, F12   | IL-1ra/IL-1F3                   | 16181          | IL1RN                                      |
| A13, A14   | BAFF/BLys/TNFSF13B                   | 24099          | CD257, TALL1, THANK, ZTNF4                           | F13, F14   | IL-2                            | 16183          |                                            |
| A15, A16   | C1q R1/CD93                          | 17064          | AA4 Antigen, C1q Rp, CD93                            | F15, F16   | IL-3                            | 16187          |                                            |
| A17, A18   | CCL2/JE/MCP-1                        | 20296          | MCAF                                                 | F17, F18   | IL-4                            | 16189          | B cell-stimulatory factor-1                |
| A19, A20   | CCL3/CCL4/MIP-1 $\alpha$ / $\beta$   | 20302/20303    |                                                      | F19, F20   | IL-5                            | 16191          |                                            |
| A21, A22   | CCL5/RANTES                          | 20304          | SISd                                                 | F21, F22   | IL-6                            | 16193          |                                            |
| A23, A24   | Reference Spots                      | N/A            |                                                      | F23, F24   | IL-7                            | 16196          |                                            |
| B3, B4     | CCL6/C10                             | 20305          | MRP-1                                                | G1, G2     | IL-10                           | 16153          | CSIF                                       |
| B5, B6     | CCL11/Eotaxin                        | 20292          |                                                      | G3, G4     | IL-11                           | 16156          |                                            |
| B7, B8     | CCL12/MCP-5                          | 20293          |                                                      | G5, G6     | IL-12 p40                       | 16160          |                                            |
| B9, B10    | CCL17/TARC                           | 20295          |                                                      | G7, G8     | IL-13                           | 16163          |                                            |
| B11, B12   | CCL19/MIP-3 $\beta$                  | 24047          | ELC                                                  | G9, G10    | IL-15                           | 16168          |                                            |
| B13, B14   | CCL20/MIP-3 $\alpha$                 | 20297          | exodus-1, LARC                                       | G11, G12   | IL-17A                          | 16171          |                                            |
| B15, B16   | CCL21/6CKine                         | 18829          | exodus-2, SCYA21, SLC, TCA-4                         | G13, G14   | IL-22                           | 50929          | IL-TIF                                     |
| B17, B18   | CCL22/MDC                            | 20299          | ABCD-1, MDC, STCP-1                                  | G15, G16   | IL-23                           | 83430          |                                            |
| B19, B20   | CD14                                 | 12475          |                                                      | G17, G18   | IL-27 p28                       | 246779         |                                            |
| B21, B22   | CD40/TNFRSF5                         | 21939          |                                                      | G19, G20   | IL-28A/B                        | 330496/338374  |                                            |
| C3, C4     | CD160                                | 54215          | Natural killer cell receptor BY55, NK1; NK28         | G21, G22   | IL-33                           | 77125          | NF HEV, DVS 27                             |
| C5, C6     | Chemerin                             | 71660          | RARRES2, TIG-2                                       | G23, G24   | LDL R                           | 16835          | low density lipoprotein receptor           |
| C7, C8     | Chitinase 3-like 1                   | 12654          | CHI3L1, Cgp39, YKL40                                 | H1, H2     | Leptin                          | 16846          | OB                                         |
| C9, C10    | Coagulation Factor III/Tissue Factor | 14066          | TF, CD142, Thromboplastin                            | H3, H4     | LIF                             | 16878          |                                            |
| C11, C12   | Complement Component C5/C5a          | 15139          | C5/C5a                                               | H5, H6     | Lipocalin-2/NGAL                | 16819          | Siderocalin, 24p3                          |
| C13, C14   | Complement Factor D                  | 11537          | Adipsin, C3 convertase activator, Properdin factor D | H7, H8     | LIX                             | 20311          | CXCL5, GCP-2, ENA-78                       |
| C15, C16   | C-Reactive Protein/CRP               | 12944          |                                                      | H9, H10    | M-CSF                           | 12977          | CSF-1                                      |
| C17, C18   | CX3CL1/Fractalkine                   | 20312          | FKN, Neurotactin                                     | H11, H12   | MMP-2                           | 17390          | Gelatinase A                               |
| C19, C20   | CXCL1/KC                             | 14825          | CINC-1; GRO alpha; KC; MGSA-alpha                    | H13, H14   | MMP-3                           | 17392          | Stromelysin-1                              |
| C21, C22   | CXCL2/MIP-2                          | 20310          | GRO $\beta$ , GRO2, CINC-3                           | H15, H16   | MMP-9                           | 17395          | Clg4b, Gelatinase B, GELB                  |
| D1, D2     | CXCL9/MIG                            | 17329          | CRG-10, CMK                                          | H17, H18   | Myeloperoxidase                 | 17523          | MPO                                        |
| D3, D4     | CXCL10/IP-10                         | 15945          | CRG-2, C7                                            | H19, H20   | Osteopontin (OPN)               | 20750          | Eta-1, Spp1                                |
| D5, D6     | CXCL11/I-TAC                         | 56066          | H174, SCYB9B                                         | H21, H22   | Osteoprotegerin/TNFRSF11 B      | 18383          | OPG, Ocif                                  |
| D7, D8     | CXCL13/BLC/BCA-1                     | 55985          |                                                      | H23, H24   | PD-ECGF/Thymidine phosphorylase | 72962          | dThdPase, ECGF1, Gliostatin, MEDP51, MNGIE |
| D9, D10    | CXCL16                               | 66102          | SRPSOX                                               | I1, I2     | PDGF-BB                         | 18591          |                                            |
| D11, D12   | Cystatin C                           | 13010          | ARMD11, CST3, Gamma-trace                            | I3, I4     | Pentraxin 2/SAP                 | 20219          | PTX2                                       |
| D13, D14   | DKK-1                                | 13380          | Dickkopf-1                                           | I5, I6     | Pentraxin 3/TSG-14              | 19288          | PTX3                                       |
| D15, D16   | DPPIV/CD26                           | 13482          | Dpp4, Dipeptidyl-peptidase IV                        | I7, I8     | Periostin/OSF-2                 | 50706          | Fasciclin I-like, POSTN, TRIF52            |
| D17, D18   | EGF                                  | 13645          | Epidermal Growth Factor                              | I9, I10    | Pref-1/DLK-1/FA1                | 13386          | DLK1, pG2, ZOG                             |
| D19, D20   | Endoglin/CD105                       | 13805          | ENG                                                  | I11, I12   | Proliferin                      | 18811          | MRP                                        |
| D21, D22   | Endostatin                           | 12822          | Col18a1                                              | I13, I14   | Proprotein Convertase 9/PCSK9   | 100102         | NARC-1                                     |
| D23, D24   | Fetuin A/AHSG                        | 11625          | AHSG, alpha-2-HS-glycoprotein                        | I15, I16   | RAGE                            | 11596          | AGER                                       |
| E1, E2     | FGF acidic                           | 14164          | FGF-1                                                | I17, I18   | RBP4                            | 19662          | Retinol-Binding Protein 4                  |
| E3, E4     | FGF-21                               | 56636          |                                                      | I19, I20   | Reg3G                           | 19695          | PAP3                                       |
| E5, E6     | Flt-3 Ligand                         | 14256          | Flt3lg                                               | I21, I22   | Resistin                        | 57264          | ADSF, FIZZ3                                |
| E7, E8     | Gas 6                                | 14456          | Growth Arrest Specific                               | J1, J2     | Reference Spots                 | N/A            |                                            |
| E9, E10    | G-CSF                                | 12985          | Csf3                                                 | J3, J4     | E-Selectin/CD62E                | 20339          | ELAM1, LECAM2, Sele                        |
| E11, E12   | GDF-15                               | 23886          | MIC-1                                                | J5, J6     | P-Selectin/CD62P                | 20344          | GMP-140, LECAM3, Selep                     |
| E13, E14   | GM-CSF                               | 12981          | Csf2                                                 | J7, J8     | Serpin E1/PAI-1                 | 18787          | Nexin, PLANH1                              |
| E15, E16   | HGF                                  | 15234          | Scatter Factor, SF, Hepatopoietin-A                  | J9, J10    | Serpin F1/PEDF                  | 20317          | EPC-1                                      |
| E17, E18   | ICAM-1/CD54                          | 15894          |                                                      | J11, J12   | Thrombopoietin                  | 21832          | Tpo, MGDF                                  |
| E19, E20   | IFN- $\gamma$                        | 15978          | IFNG                                                 | J13, J14   | TIM-1/KIM-1/HAVCR               | 171283         |                                            |
| E21, E22   | IGFBP-1                              | 16006          |                                                      | J15, J16   | TNF- $\alpha$                   | 21926          | TNFSF1A                                    |
| E23, E24   | IGFBP-2                              | 16008          |                                                      | J17, J18   | VCAM-1/CD106                    | 22329          |                                            |
|            |                                      |                |                                                      | J19, J20   | VEGF                            | 22339          | VEGF-A, VPF                                |
|            |                                      |                |                                                      | J21, J22   | WISP-1/CCN4                     | 22402          |                                            |
|            |                                      |                |                                                      | J23, J24   | Negative Control                | N/A            |                                            |

**Appendix Figure S5. Datasheet of mouse XL cytokine array kit.**

*Upper panels:* High resolution scans of original mouse XL cytokine arrays, *Middle panel:* overlay template and coordinates; *Lower panels:* reading appendix.



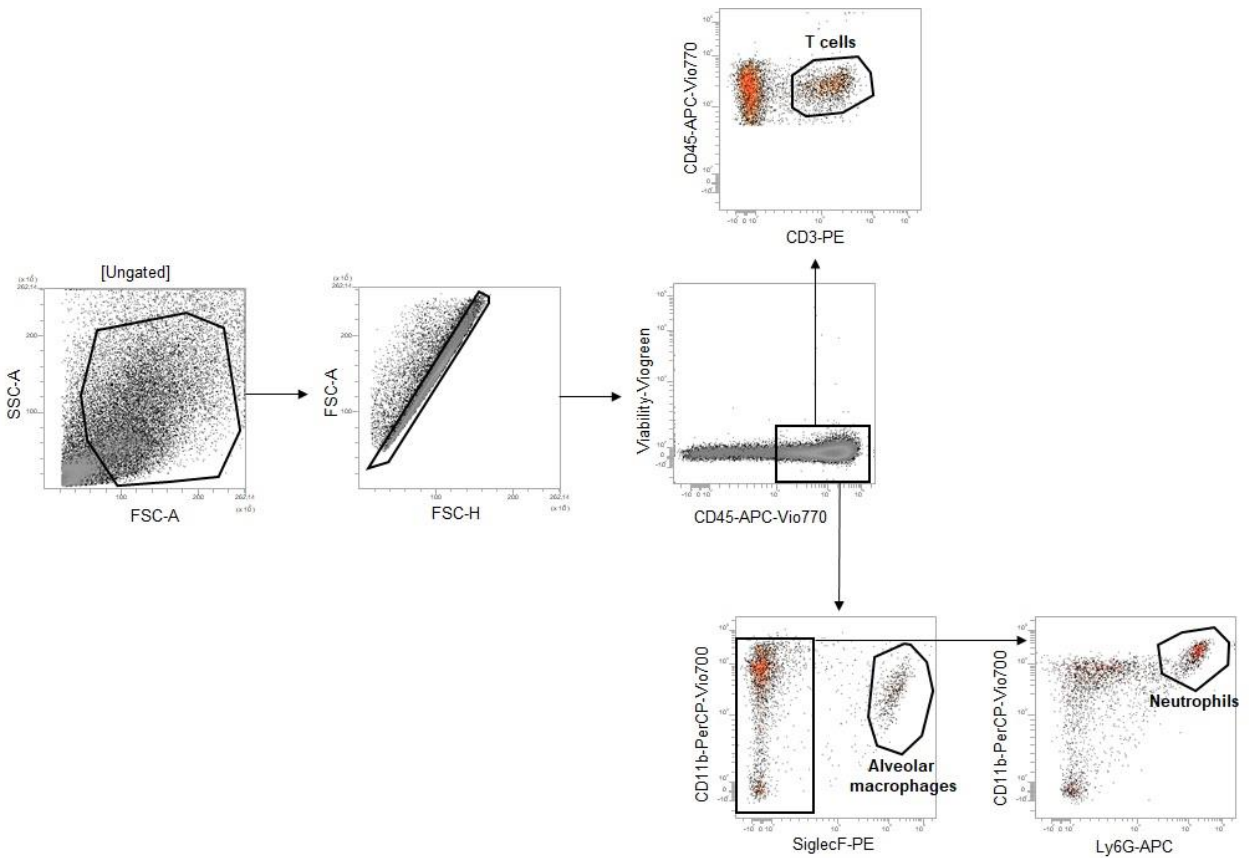

**Appendix Figure S6. Flow cytometry gating strategy.**

Surface gating used to define immune cell subsets in Figure 4.

# Guillon *et al.* Appendix Figure S7

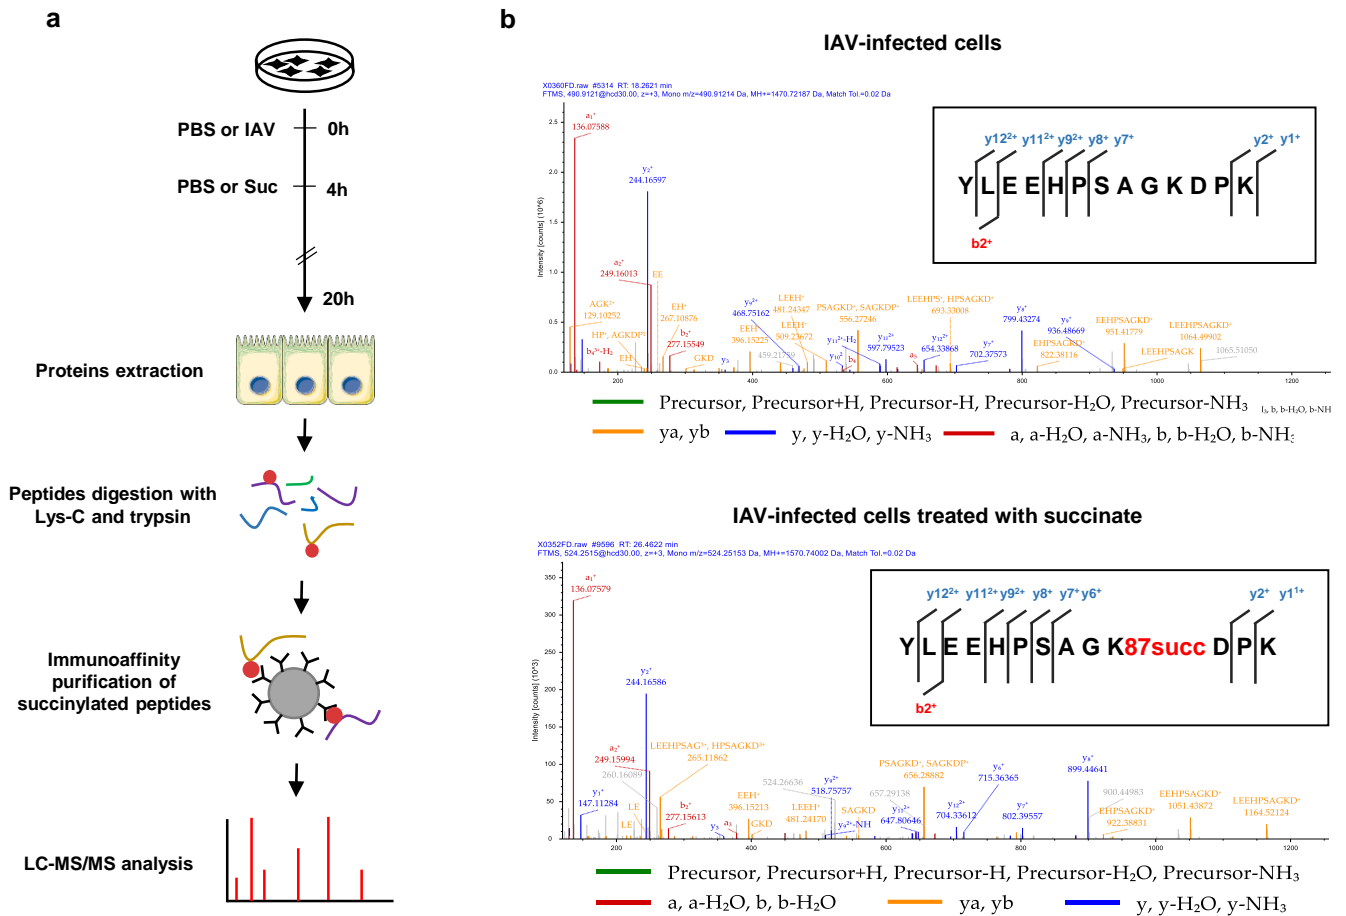

## Appendix Figure S7. Mass spectrometry methodology and profiles.

(a) Human bronchial epithelial BEAS-2B cells were infected with A/Scotland/20/74 (H3N2) virus (IAV) at MOI=1 for 4 h, and subsequently treated or not with 4 mg/mL of succinate for 20 h. Cells were lysed and proteins were digested to peptides with Lys-C and trypsin. Succinylated peptides were isolated directly from protease-digested cellular protein extracts by immunoaffinity purification (IAP) using an antibody specific for the succinyl-Lysine motif, and the modified peptides were further analyzed by LC-MS/MS. (b) Representative MS/MS spectra of succinylated and non-succinylated NP peptides.

## Guillon *et al.* Appendix Figure S8

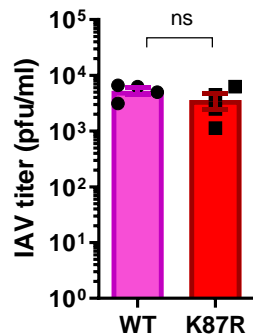

### **Appendix Figure S8. Similar growth of wild-type K87 and mutant K87R IAV strains.**

Human bronchial epithelial BEAS-2B cells were infected with influenza A/Scotland/20/74 (H3N2) (IAV) strains carrying a wild-type NP (“WT”) or a NP with a K87R substitution (“K87R”). Cells were infected by either virus at MOI=1 for 4 h, then washed and left untreated for 20 h. Plaque-Forming Units assay determined the production of infectious viral particles in cell supernatants. Data are represented as the mean  $\pm$  SEM of 4 independent experiments. Statistical analysis was performed using the Mann-Whitney test.

## Guillon *et al.* Appendix Figure S9

|                           | 1- NP K87                                                                         | 2- NP K87E                                                                        | 3- NP K87 succinylated                                                             |
|---------------------------|-----------------------------------------------------------------------------------|-----------------------------------------------------------------------------------|------------------------------------------------------------------------------------|
| NP structure              | 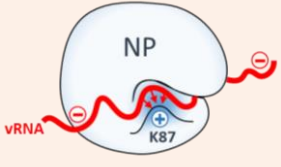 |  |  |
| Charge of the K87 residue | +                                                                                 | -                                                                                 | -                                                                                  |
| NP-vRNA interaction       | +++                                                                               | +                                                                                 | +                                                                                  |

### Appendix Figure S9. Impact of the NP structure on its interaction capacity with viral RNA.

*Panel 1:* In NP, the Lysine (K)87 is a positively charged amino acid which is key in the interaction with negatively charged vRNA. *Panel 2:* Conversely, glutamic acid (E) is a negatively charged residue. As a result, NP K87E mutant interacts less with vRNAs. *Panel 3:* In succinate-treated cells, the addition of a succinyl group to the NP K87 residue neutralizes the positive charge of lysine and imparts a negative charge, thus altering the NP-vRNA interaction as well.

# Guillon *et al.* Appendix Table S1

| REAGENT OR RESOURCE                                                       | SOURCE                                             | IDENTIFIER       |                                                                                  |                               |                                                                                                                                                                                                                 |
|---------------------------------------------------------------------------|----------------------------------------------------|------------------|----------------------------------------------------------------------------------|-------------------------------|-----------------------------------------------------------------------------------------------------------------------------------------------------------------------------------------------------------------|
| <b>Antibodies</b>                                                         |                                                    |                  | <b>Commercial Assays</b>                                                         |                               |                                                                                                                                                                                                                 |
| Anti-Influenza A Virus Nucleoprotein antibody                             | Abcam                                              | ab128193         | LIVE/DEAD™ Fixable Aqua Dead Cell Stain Kit                                      | ThermoFisher Scientific       | L34966                                                                                                                                                                                                          |
| Anti-Influenza A Virus Nucleoprotein antibody FITC                        | Abcam                                              | ab20921          | CellTiter 96® AQueous One Solution Cell Proliferation Assay                      | Promega                       | G3582                                                                                                                                                                                                           |
| Anti-NP mAb clone 3/1                                                     | Gift from Dr Webby, St Jude Hospital, Memphis, USA | N/A              | Pierce™ BCA Protein Assay Kit                                                    | ThermoFisher Scientific       | 23225                                                                                                                                                                                                           |
| Anti-Influenza A M1 antibody                                              | Abcam                                              | ab22396          | Phusion™ High-fidelity DNA polymerase                                            | Fisher Scientific             | 16237911                                                                                                                                                                                                        |
| Anti-Influenza A NEP/NS2 antibody                                         | Invitrogen                                         | PA532235         | Nucleospin® RNA                                                                  | Macherey-Nagel                | 740955                                                                                                                                                                                                          |
| Anti-Influenza A PA antibody                                              | Invitrogen                                         | PA532223         | High Capacity cDNA reverse transcription kit                                     | Applied Biosystems            | 4368813                                                                                                                                                                                                         |
| Anti-Influenza A M2 antibody                                              | Santa Cruz Biotechnology                           | sc-32238         | Human IL6 ELISA DuoSet                                                           | R&D Systems                   | DY206                                                                                                                                                                                                           |
| Anti-Influenza A PB2 antibody                                             | Invitrogen                                         | PA532220         | Human IL8 ELISA DuoSet                                                           | R&D Systems                   | DY208                                                                                                                                                                                                           |
| Anti-Influenza NS1 antibody                                               | Gift from Dr Marc, INRAE, Nouzilly, France         | N/A              | Human IP-10 ELISA DuoSet                                                         | R&D Systems                   | DY266                                                                                                                                                                                                           |
| Anti-CRM1 antibody                                                        | BD Biosciences                                     | 611832           | Human RANTES ELISA DuoSet                                                        | R&D Systems                   | DY278                                                                                                                                                                                                           |
| beta Actin Monoclonal Antibody                                            | ThermoFisher Scientific                            | MA5-15739        | Mouse IL6 ELISA DuoSet                                                           | R&D Systems                   | DY406                                                                                                                                                                                                           |
| Anti-Mouse IgG (whole molecule)– Peroxidase antibody                      | Sigma-Aldrich                                      | A9044            | Mouse KC ELISA DuoSet                                                            | R&D Systems                   | DY453                                                                                                                                                                                                           |
| Anti-Rabbit IgG (whole molecule)– Peroxidase antibody                     | Sigma-Aldrich                                      | A9169            | Mouse MPO ELISA DuoSet                                                           | R&D Systems                   | DY3667                                                                                                                                                                                                          |
| Anti-Mouse IgG1 Secondary Antibody, Alexa Fluor 488                       | ThermoFisher Scientific                            | A21121           | Human Cytokine Array Kit                                                         | R&D Systems                   | ARY005B                                                                                                                                                                                                         |
| Anti-Rabbit IgG Secondary Antibody, Alexa Fluor 488                       | ThermoFisher Scientific                            | A11008           | Mouse XL Cytokine Array                                                          | R&D Systems                   | ARY028                                                                                                                                                                                                          |
| APC-eFluor780-conjugated anti-CD45 (30-F11)                               | ThermoFisher Scientific                            | 47-0451-82       | PTMScan® Succinyl-lysine Motif SurePrint G3 human gene expression microarray kit | Cell Signaling                | 13764                                                                                                                                                                                                           |
| FITC-conjugated anti-Ly6G (1A8)                                           | BioLegend                                          | 127605           | Low Input Quick Amp labeling kit                                                 | Agilent Technologies          | G4851C                                                                                                                                                                                                          |
| PerCP-Cy5.5-conjugated anti-CD11b (M1/70)                                 | BioLegend                                          | 101227           |                                                                                  | Agilent Technologies          | 5190-2308                                                                                                                                                                                                       |
| APC-conjugated anti-CD11c (N418)                                          | BioLegend                                          | 117309           | <b>Consumables</b>                                                               |                               |                                                                                                                                                                                                                 |
| PECy7-conjugated anti-CD3e (145-2C11)                                     | BD Pharmingen                                      | 552774           | 3 mm High Throughput NMR Tube                                                    | CortecNet                     | WG-3000-7-50                                                                                                                                                                                                    |
| PE-conjugated anti-Siglec F (E50-2440)                                    | BD Pharmingen                                      | 552126           | C18 Nano Trap Columns                                                            | Thermo Scientific             | 164535                                                                                                                                                                                                          |
| Vioblu-conjugated anti-F4/80 (clone BM8)                                  | ThermoFisher Scientific                            | 48-4801-82       | C18 Acclaim PepMap RSLC Columns                                                  | Thermo Scientific             | 164540                                                                                                                                                                                                          |
| <b>Chemicals, peptides</b>                                                |                                                    |                  | Sep-Pak tC18 6 cc Vac Cartridge                                                  | Waters                        | 186004621                                                                                                                                                                                                       |
| Poly(I:C) LMW 25mg                                                        | Invivogen                                          | tIrl-picw        | Gentle MACSTM M tube                                                             | Miltenyi Biotech              | 130-093-236                                                                                                                                                                                                     |
| Disodium succinate                                                        | Sigma-Aldrich                                      | W327700          | <b>Experimental Models</b>                                                       |                               |                                                                                                                                                                                                                 |
| Sodium malonate dibasic monohydrate                                       | Sigma-Aldrich                                      | M4795            | C57BL/6                                                                          | Janvier                       | C57BL/6JRFEMELLESPF4                                                                                                                                                                                            |
| Leptomycin B                                                              | Enzo Life Sciences                                 | ALX-380-100-C100 | BEAS-2B                                                                          | ATCC®                         | CRL-9609                                                                                                                                                                                                        |
| Lipofectamine™ LTX Reagent with PLUS™ reagent                             | Invitrogen                                         | 15338030         | A549                                                                             | ATCC®                         | CCL-185                                                                                                                                                                                                         |
| ActinRed™ 555 ReadyProbes™ Reagent                                        | ThermoFisher Scientific                            | R37112           | MDCK.2                                                                           | ATCC®                         | CRL-2935                                                                                                                                                                                                        |
| NucBlue™ Fixed Cell ReadyProbes™ Reagent                                  | ThermoFisher Scientific                            | R37606           | HEK293T                                                                          | ATCC®                         | CRL-11268                                                                                                                                                                                                       |
| 2'-(4-Methylumbelliferyl)-α-D-N-acetylneuraminic acid sodium salt hydrate | Chemodex                                           | M0096            | 16HBE14o-                                                                        | Sigma-Aldrich                 | SCC150                                                                                                                                                                                                          |
| Protease Inhibitor Cocktail                                               | Sigma Aldrich                                      | P8340            | Influenza A/Scotland/20/74                                                       | Pasteur Institute, France     | N/A                                                                                                                                                                                                             |
| Gibco™ Ham's F-12 Nutrient Mix                                            | Fisher Scientific                                  | 31765027         | Influenza A/WSN/33 wild type and NS1flag-tagged                                  | INRAE, Jouy-en-Josas, France  | N/A                                                                                                                                                                                                             |
| Gibco™ MEM                                                                | Fisher Scientific                                  | 31095029         | Influenza A/PR8 wild type and delta NS1                                          | FFreiburg University, Germany | N/A                                                                                                                                                                                                             |
| Gibco™ DMEM                                                               | Fisher Scientific                                  | 11594446         | <b>Softwares</b>                                                                 |                               |                                                                                                                                                                                                                 |
| Trypsin 0.25 %/EDTA 0.02 % in PBS                                         | PAN BIOTECH                                        | P10-020100       | GraphPad Prism                                                                   | GraphPad Software             | <a href="https://www.graphpad.com/scientific-software/prism/">https://www.graphpad.com/scientific-software/prism/</a>                                                                                           |
| Trypsin, TPCK Treated                                                     | ThermoFisher Scientific                            | 20233            | VenturiOne                                                                       | Applied Cytometry             | <a href="https://www.appliedcytometry.com/venturi/">https://www.appliedcytometry.com/venturi/</a>                                                                                                               |
| Trypsin / Lys-C Mix, Mass Spec Grade                                      | Promega                                            | V5072            | FUJI FILM Multigauge LightCycler 480 SW V.1.5 ImageJ                             | Bioz Roche Imagej             | <a href="https://www.bioz.com/">https://www.bioz.com/</a><br><a href="https://lifescience.roche.com/">https://lifescience.roche.com/</a><br><a href="https://imagej.net/Welcome">https://imagej.net/Welcome</a> |
| MEM Eagle with Earle's BSS (2X)                                           | Lonza                                              | BE12-668F        | BioStation IM software (v2.12)                                                   | Nikon                         | <a href="https://www.nikon.com/products/microscope-solutions/">https://www.nikon.com/products/microscope-solutions/</a>                                                                                         |
| Crystal Violet Oxalate                                                    | RAL Diagnostics                                    | 361490           | Leica LasX Life Sciences                                                         | Leica Microsystems            | <a href="https://www.leica-microsystems.com">https://www.leica-microsystems.com</a>                                                                                                                             |
| Formaldehyde, 37 wt % sol. in water, stab. with 5-15% methanol            | Acros Organics                                     | 119690010        | Digital Micrograph V.3                                                           | Gatan                         | <a href="https://www.gatan.com/products/tem-analysis">https://www.gatan.com/products/tem-analysis</a>                                                                                                           |
| Avicel® RC 581 Stabilizer                                                 | FMC BioPolymer                                     | N/A              | AMIX software package (Analysis of MIXture, version 3.9.14)                      | Bruker Biospin                | <a href="https://www.bruker.com/products/mr/nmr/software/amix">https://www.bruker.com/products/mr/nmr/software/amix</a>                                                                                         |
| Annexin V-FITC kit                                                        | Miltenyi Biotech                                   | 130-092-052      | SIMCA 13.0.3 software                                                            | Umetrics                      | <a href="https://umetrics.com/kb/simca-1303">https://umetrics.com/kb/simca-1303</a>                                                                                                                             |
| Propidium Iodide Solution                                                 | Miltenyi Biotech                                   | 130-093-233      | ChenomX NMR Suite 8.1                                                            | ChenomX                       | <a href="https://www.chenomx.com/product/s/">https://www.chenomx.com/product/s/</a>                                                                                                                             |
| True-Nuclear™ Transcription Factor Buffer Set                             | Biologend                                          | 424401           | MetaboAnalyst                                                                    | MetaboAnalyst                 | <a href="https://www.metaboanalyst.ca/">https://www.metaboanalyst.ca/</a>                                                                                                                                       |
| BD Cytotfix/Cytoperm™                                                     |                                                    |                  | Topspin version 3.6 software                                                     | Bruker Daltonik               | <a href="https://www.bruker.com/products/mr/nmr/software/topspin">https://www.bruker.com/products/mr/nmr/software/topspin</a>                                                                                   |
| Fixation/Permeabilization Solution Kit                                    | Fisher Scientific                                  | BDB554714        | GeneSpring software                                                              | Agilent Technologies          | <a href="https://www.agilent.com/">https://www.agilent.com/</a>                                                                                                                                                 |
| Red Blood Cell Lysing Buffer Hybri-Max™                                   | Sigma Aldrich                                      | R7757            | Ingenuity Pathways Analysis (IPA) software                                       | Qiagen                        | <a href="https://digitalinsights.qiagen.com/">https://digitalinsights.qiagen.com/</a>                                                                                                                           |
| TB Green® Premix Ex Taq™                                                  | Takara                                             | RR420L           | Feature Extraction software version 10.7.3.1                                     | Agilent Technologies          | <a href="https://www.agilent.com/">https://www.agilent.com/</a>                                                                                                                                                 |
| 50% EM Glutaraldehyde                                                     | TAAB Laboratory Equipment                          | G045             | Post Run Analysis software                                                       | Shimadzu                      | <a href="https://www.shimadzu.com">https://www.shimadzu.com</a>                                                                                                                                                 |
| Uranyl acetate                                                            | Merck                                              | 8473             | myProMS (Vesrion 3.9)                                                            | LSMP, Institut Curie, France  | <a href="https://pubmed.ncbi.nlm.nih.gov/17610305/">https://pubmed.ncbi.nlm.nih.gov/17610305/</a>                                                                                                               |
| Osmium tetroxide 4% solution                                              | Electron Microscopy Science                        | 19150            | Xcalibur software                                                                | Thermo Scientific             | <a href="https://www.thermofisher.com">https://www.thermofisher.com</a>                                                                                                                                         |
| Propylene oxide                                                           | Alfa Aesar                                         | 30765            | Seahorse Wave Controller Software                                                | Agilent                       | <a href="https://www.agilent.com">https://www.agilent.com</a>                                                                                                                                                   |
| Epon™ MNA substitute                                                      | Sigma Aldrich                                      | 45347            | Seahorse Wave Desktop Software                                                   | Agilent                       | <a href="https://www.agilent.com">https://www.agilent.com</a>                                                                                                                                                   |
|                                                                           |                                                    |                  | R software (Version 3.4.4)                                                       | r-project                     | <a href="https://www.r-project.org/">https://www.r-project.org/</a>                                                                                                                                             |
|                                                                           |                                                    |                  | Omnilog Data Collection 2.4                                                      | Biolog                        | <a href="https://www.biolog.com">https://www.biolog.com</a>                                                                                                                                                     |
|                                                                           |                                                    |                  | PM-M Kinetic and PM-M Parametric                                                 | Biolog                        | <a href="https://www.biolog.com">https://www.biolog.com</a>                                                                                                                                                     |
